# Supplementary material for: A comparative analysis of colour preferences in temperate and tropical social bees
Source: PubMed Central journal article supplement (PMC5750331; doi:10.1007/s00114-017-1531-z), 2018-01-02
Supplement: 114_2017_1531_MOESM1_ESM.pdf [file 114_2017_1531_MOESM1_ESM.pdf]

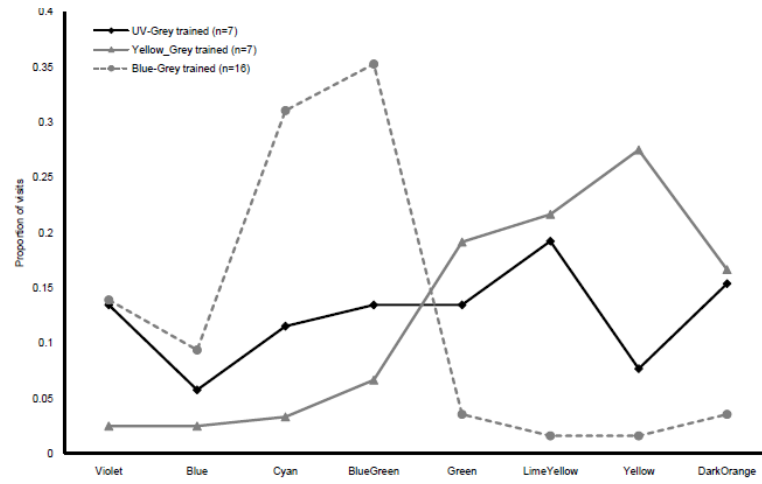

Fig S1. Pilot experiments with free-flying *A. cerana* foragers that were experienced with natural flowers. Bees generalized towards short wavelength colours after training with Pale-Blue stimuli ( $sst = 758.99$ ,  $p=0.0002$ ,  $\chi^2_1 = 59.29$ ,  $df = 1$ ,  $p < 0.001$ ) and long wavelength colours ( $sst = 141.71$ ,  $p=0.0062$ ,  $\chi^2_1 = 47.61$ ,  $df = 1$ ,  $p < 0.001$ ) after training with a Pale-Yellow stimuli. After training to UV-Grey stimuli, bees did not exhibit any preference patterns ( $sst = 4.85$ ,  $p=0.860$ ,  $\chi^2_1 = 1.21$ ,  $df = 1$ ,  $p = 0.27$ ), which is likely to be an effect of mixed previous experiences with flower colours that the foragers had.
